# Supplementary material for: Modified Bidirectional Encoder Representations From Transformers Extractive Summarization Model for Hospital Information Systems Based on Character-Level Tokens (AlphaBERT): Development and Performance Evaluation
Source: PubMed Central journal article supplement (PMC7221648; doi:10.2196/17787), 2020-04-29
Supplement: medinform_v8i4e17787_app3.pdf [file medinform_v8i4e17787_app3.pdf]

1. **Bladder cancer**, urothelial carcinoma, Ta low grade, s/p post **TURBT** on 2018/4/10 and 2018/7/3 with no recurrence, status post **TURBT** on 2018/9/28 with **tumor recurrence**, status post 6-month **TURBT** on 2018/10/30 with Ta LG recurrence status post 3-month **TURBT** on 2018/12/29 (patho: chronic cystitis) 2. **Left hydronephrosis**, post left URS with no gross lesion 3. **Coronary arterial disease**, 2-vessel disease, status post **POBAS** to LAD, with non-significant ISR, post **POBAS** to RCA, under **DAPT** 4. **Gastric ulcer** 5. Gastroesophageal reflux disease 6. **Hyperlipidemia**



1. Acute **cholecystitis** 2. **Follicular B cell lymphoma**, grade II, stage IIIA, CD20(+), CD10(+), status post R-Bendamustin(III, C1D0=2015/07/30, C2D0=2015/10/12, C3D0=2015/11/06), in partial remission, status post maintenance Rituximab (C1D1=2016/04/22, C2D1=2016/08/27, C3D1=2016/11/17, C4D1=2017/02/12) 3. **Vulvar cancer**, squamous cell carcinoma, suspect Bartholin originated, cT3N2bM0, stage IVA, status post definitive CCR T (5500 cGy / 25 fractions, 2015/05/05-2015/06/08, Cisplatin, 40 mg/m2, C1D1=2015/05/05, C2D1=2015/05/12, C3D1=2015/05/19, C4D1=2015/05/27, C5D1=2015/06/02) 4. **Hypertension** for 5 years, on Aprovel and Carvedilol 5. Type 2 **diabetes mellitus**, on Glimpiride, Metformin, and Levemir 6. **Hyperthyroidism**, status post **partial thyroidectomy** about 25 years ago 7. Bilateral non-proliferative diabetic **retinopathy** 8. History of radiation related enteritis and cystitis



1. **Colon cancer**, ileocecal valve, KRAS G115E mutant, NRAS wild type, BRAF wild type, mismatch repair proficient (MSS), pT3aN2aM0, status post **right hemicolectomy** in 2014/07/11, status post adjuvant FOLFOX (XII), with bilateral **ovarian and peritoneal metastases**, status post A+FOLFIRI (III), status post **debulking surgery** in 2016/04/01, status post A+FOLFIRI (IV-VIII) during 2016/05/08-2016/08/27, status post oral capecitabine during 2016/09/20-2017/08, complicated with hand-foot-mouth syndrome, status post UFUR during 2017/01-2017/08, **progression** with **peritoneal seeding**, status post A+FOLFIRI(X, C1D1=2017/08/30, C10D1=2018/01/31), progression, status post A+FOLFOX(I, C1D1=2018/03/12), status post palliative radiotherapy to L1-S1 spine(2500 cGy in 5fr) during 2018/03/26-03/30, status post A+FOLFOX(II, C2D1=2018/04/11) 2. Mitral valve prolapse, under propanolol, Sigmart 3. Hyponatremia, suspect poor intake related



1. Community acquired **pneumonia** 2. **Hypertension**, noted for more than 10 years, under Seika and concor



1. Type I **respiratory failure**, related to influenza A pneumonia, status post **endotracheal tube and mechanical ventilation**(2016/10/03-) 2. Acute kidney injury, KDIGO stage I



1. **Asthma** acute exacerbation. 2. Suspect occult **pneumonia**. 3. **Constipation**.



**Pregnancy** for 36+1 weeks with **hypertension**



1. **Hepatocellular carcinoma (HCC)**, Barcelona Clinic Liver Cancer (BCLC) stage A, status post (s/p) S5 **segmentectomy** with **cholecystectomy** on 2005/4/27; **recurrence** as BCLC stage B, status post transarterial chemo embolization (**TACE**) on 2013/4/2, status post radiofrequency ablation (**RFA**) on 2013/5/6; recurrence with **peritoneal metastases** BCLC stage C, status post RFA on 2014/10/23 and laparoscopic intra-abdominal **tumor excision** on 2015/1/7; complicated with **HCC rupture**, status post **TACE** on 2015/4/16; relapsed **rupture HCC**, status post **transarterial embolization** on 2015/6/24, status post 1st Y90 selective internal radiation therapy (SIRT) on 2015/07/09, status post second Y90 SIRT on 2015/7/23; in progression, status post TACE(CeloNova trial) on 2015/12/10 (I), on 2016/1/18 (II); in progression on Nexavar(2016/05/31~2017/08), status post TACE (CeloNova trial) on 2016/7/4 (III), on 2016/7/11 (IV) and on 2016/10/17 (V); recurrence as BCLC stage C, status post RFA on 2017/2/3, with recurrence on **peritoneal seeding** status post mini-laparotomy for peritoneal **tumor excision** on 2017/08/30 with local recurrence on liver, status post TACE on 2017/11/29, with recurrence at S1, status post stereotactic body radiation therapy(SBRT, 2018/04/03-2018/04/16), with multiple recurrence in the liver and suspect **peritoneal metastasis**, status post BGB-A317
