# Supplementary material for: Modified Bidirectional Encoder Representations From Transformers Extractive Summarization Model for Hospital Information Systems Based on Character-Level Tokens (AlphaBERT): Development and Performance Evaluation
Source: PubMed Central journal article supplement (PMC7221648; doi:10.2196/17787), 2020-04-29
Supplement: medinform_v8i4e17787_app4.pdf [file medinform_v8i4e17787_app4.pdf]

[Active problem] 1. Normocytic **anemia**, favor anemia of chronic disease and **jejuneum** bleeding 2. **Chronic kidney disease** with proteinuria, stage IV, suspected DM nephropathy, with acute **exacerbation**, suspected over diuresis [Underlying disease] 1. **Diabetes mellitus**, with HbA1c 6.5 % on , under NovoRAPID (8U-10U-12U) and Toujeo (51U) 2. **Heart failure** with reduced ejection fraction(LVEF:30.8% on 2017/10/11), suspect ischemic **cardiomyopathy** 3. **Coronary artery disease**, 1-vessel-disease, LAD 3 . **Dyslipidemia** under Lipitor and Fenofibrate



1. **Coronary artery disease**, three vessel disease, status post POBAS to LAD and RCA on 2011/07/06, complicated with **non-ST** elevation myocardial infarction, TIMI 6, Grace score 196, suspect Wellens' syndrome 2. Congestive **heart failure**, suspect ischemic heart disease related, NYHA function class III 3. **Hyperlipidemia** 4. **Hypertension** 5. **Chronic kidney disease**, stage IV (baseline creatinine was 3.6 mg/dL) 6. Transient hypoxic **respiratory failure**, status post endotracheal extubation with mechanical ventilation(2015/09/21-2015/09/21) 7. **Common bile duct stone** with common bile duct obstruction, status-post endoscopic sphincterotomy and lithotripsy on 2015/09/21 8. Gall bladder stone 9. Gouty arthritis 10. **Sigmoid colon cancer**, status-post segmental resection on 2011/06/25



1. **Urinary tract infection**, complicated with Gram negative bacteremia .->Cefuroxime(07/09~, day 1) == Underlying disease == **Bladder cancer**, transitional cell **carcinoma** (TCC) grade 2 .Benign prostate hyperplasia(BPH) under medication, complicated with urine retention .->Tamulosin HCl 2#HS .**Chronic kidney disease**, Stage 3b .**Ischemic stroke** 3 months ago, with left hand weakness .Paroxysmal **atrial fibrillation** .**Coronary artery disease**, status post 4 stenting 10 years ago .->Apixaban 0.5#BID .->Ginkgo Biloba Extract 1#BID .->Pentoxifylline 1#QD .**Chronic obstructive pulmonary disease(COPD)** .Gout .->Fubuxostat 1#QD .**Left renal Transitional cell carcinoma(TCC)**, status post **nephrourectomy** on 2003/01



1. **Non-small cell lung cancer**, adenocarcinoma, left lower lung, with EGFR mutation (exon 19 Del), ALK(-), ROS1(-), PD-L1(>90%(2017/10/23, left axillary lymph node); >70%(2018/03/21, left neck lymph node)), pT2a N3M1b, stage IV, status post Avastin (VII, 2017/05/03-2017/09/27) + Tarceva(2017/05/02-2017/10/27, 2018/11/06-), with **malignant pericardial effusion**, status post pemetrexed + carboplatin + nivolumab (VII, 2017/10/26-2018/03/15); with **bone metastases**, status post RT to T9, L1, L5 (2018/2/8-2/9), status post docetaxel (II, 2018/04/06-2018/04/30), status post docetaxel + ramucirumab + nivolumab (I, 2018/05/31), status post vinorelbine (2018/06/28) and Afatinib(2018/06/26-2018/11/03), status post Vinorelbine (I, 2018/07/23) and Ramucirumab (II, 2018/07/23-2018/09/21); with **metastatic breast tumor**, status post Paclitaxel (V, 2018/08/31-2018/11/29) + Ramucirumab (VI, 2018/08/31-C6D1=2018/12/21); with **brain metastases**, status post Tarceva(2018/11/06-); status post **whole brain radiotherapy** (3000Gy, 2018/12/3-12/14); with severe bilateral extremities numbness, status post Gemzar + Ramucirumab (C5D1=2019/04/08, C5D8=2019/04/17) 2. **Chronic hepatitis B**, under **Tenofovir**



[Active] 1. Aspiration **pneumonia** 2. **Hypokalemia** [Inactive] 1. **Dry gangrene**, bilateral foot, suspect previous dopamine and PAOD related 2. **Peripheral arterial occlusive disease**, status post percutaneous transluminal angioplasty to left posterior tibial artery and anterior tibial artery (2017/09/20) 3. **Mitral regurgitation**, moderate to severe; **Tricuspid regurgitation**, moderate, with diastolic **heart failure** 4. **Atrial fibrillation** with rapid ventricular response 5. **Coronary artery disease**, status post plain old balloon angioplasty with stenting 6. **Hypertension** 7. **Anemia**, suspected iron deficiency anemia 8. Osteoporosis with spinal compression fracture at T10, 12. Left proximal humerus fracture, status post left **hemishoulder arthroplasty** on 2017/02/06



1. **Shock**, s/p CPR, s/p ECMO implacement 2. **Pulmonary embolism**, s/p EKO S implacement 3. Acute embolism and thrombosis of unspecified deep veins of right proximal lower extremity 4. **Atrial fibrillation** 5. **Diabetes mellitus** 6. **Chronic kidney disease**



1. **Hepatocellular carcinoma**, BCLC stage A3, status post **atypical hepatectomy** in 2008, with recurrence, status post radiofrequency ablation(RFA) in 2012/11, status post transcatheter arterial chemembolization(TACE) and RFA in 2013/10, status post TACE in 2015/11 and 2015/12, disease progression with impending hepatic failure. 2. **Hematemesis**, rule out esophageal ulcers bleeding, rule out esophageal variceal bleeding, resolved. 3. **Hepatitis B virus** under entecavir treatment 4. **Hepatitis C virus carrier** 5. **Hypertension**



1. Suspect viral pneumonia with bilateral reticular shadows 2. **Hypertension**, under medication 3. **Diabetes Mellitus**, under diet control 4. **Poliomyelitis** with right leg weakness since childhood



1. **Coronary artery disease**, 2-vessel-disease, complicated with inferior **ST-elevation myocardial infarction** and junctional **bradycardia**, status post temporal **pacemaker** and **percutaneous occlusive balloon angioplasty** with two bare metal **stents** to right coronary artery on 2016/05/19. 2. **Hyperlipidemia** 3. **Dementia** 4. **Old cerebral vascular accident**



1. **Hypoxic encephalopathy**, stupor consciousness with bed-ridden status, recurrent infection, for palliative care. 2. **Gastric cancer**, stage I IIA, status post **subtotal gastrectomy** (2014/7), no evidence of recurrent tumor. 3. Recurrent hospital acquired **pneumonia** with multi-drug resistant pathogens, complicated with **respiration failure** requiring ventilator support, **status post tracheostomy** in 2016/6, currently under **O2 collar** support. 4. Recurrent urinary tract infection with multi-drug resistant pathogens. 5. **Relatively adrenal insufficiency**, under **Pr edonine** and **Midorine** use 6. Fever, suspect pneumonia



1. **Cholangiocarcinoma**, with left hepatic lobe invasion, left and main portal vein thrombosis, bilateral **lung metastasis**, lymphadenopathies in gastrohepatic ligament, paraaortic and mediastinum, cT3N1M1, stage I V, status post Gemzar/TS-1 TCOG trial (III)(2015/06/08-07/08), progressive disease, status post GC-HDFL(I)(C1D1 2015/07/29), status post P-HDFL(I)(C1D1 2015/8/11), status post GC-HDFL(II)(C2D1 2015/09/01), **pro gressive disease**, status post P-HDFL(II)(C2D1 2015/10/05); **I-HDFL(2)**, progression 2. Type 2 **diabetes mellitus** 3. **Cancer cachexia**



#. Urinary tract infection, extended-spectrum -lactamases Escherichia Coli related #. **Duodenal ulcer**, A1, Forrest III, bulb, posterior wall #. **Diabetic ketoacidosis**, improved #. Multiple pressure sore, left ankle, right back, sarcom, grade II to X #. Congestive **heart failure**, New York Heart Association Functional class III (2016/04/21 **LVEF:56.9%**) #. Acute on **chronic kidney disease**, cause to be determined #. Left femoral neck fracture, Garden type IV, status post bipolar hemiarthroplasty in 2017/01/10 with posterior dislocation, status post open reduction operation 2017/03/23 #. **Diabetes mellitus**, type 2, with diabetic retinopathy (2016/09/06 HbA1C: 9.0 %) #. **Dementia** [Inactive diagnosis] #. Non-ST elevation **myocardial infarction** on 2015/10/23 #. Compression fracture of spine, L1 and T11, suspect osteoporosis related, status post L1 **vertebroplasty** in 2015/07/24, status post T12 **vertebroplasty** in 2015/08/07 #. **Lumbar spondylosis** #. Osteoarthritis #. Gastroesophageal reflux disease (GERD)
